# Supplementary material for: Granzyme B PET Imaging of the Innate Immune Response
Source: PubMed Central journal article supplement (PMC7411671; doi:10.3390/molecules25133102), 2020-07-07
Supplement: molecules-25-03102-s001.pdf [file molecules-25-03102-s001.pdf]

## Supplementary Materials

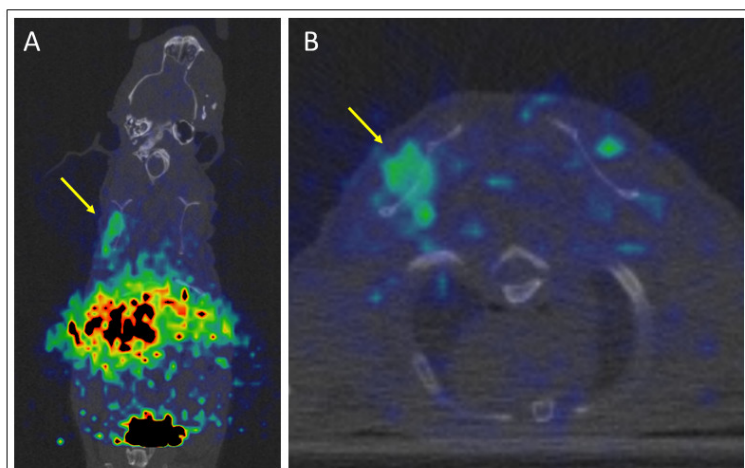

**Figure S1.** Granzyme B PET imaging of LPS-induced inflammation in T-cell deficient CrTac:NCr-Foxn1nu mice. High uptake of [ $^{68}\text{Ga}$ ]-GZP at the site of LPS injection in these mice support that the response is due to the innate immune system.
